# Supplementary material for: Prediction Models of Primary Membranous Nephropathy: A Systematic Review and Meta-Analysis
Source: MDPI journal article supplement (doi:10.3390/jcm12020559), 2023-01-10
Supplement: s1 [file s1]

## Supplementary Materials

Table S1. Literature search strategies.

| Database | Strategies                                                                                                                                                                                            |
|----------|-------------------------------------------------------------------------------------------------------------------------------------------------------------------------------------------------------|
| Medline  | ((Glomerulonephritis, Membranous[MeSH Terms]) OR 'membranous nephropathy' or 'membranous glomerulonephritis') AND ('prediction model' or 'predict* model' or 'risk score' or 'risk model' or 'model') |
| Embase   | 1. 'membranous nephropathy' or 'membranous glomerulonephritis' or 'membranous nephri*'<br>2. 'prediction model' or 'predict* model' or 'risk score' or 'risk model' or 'model'<br>3. #1 AND #2        |

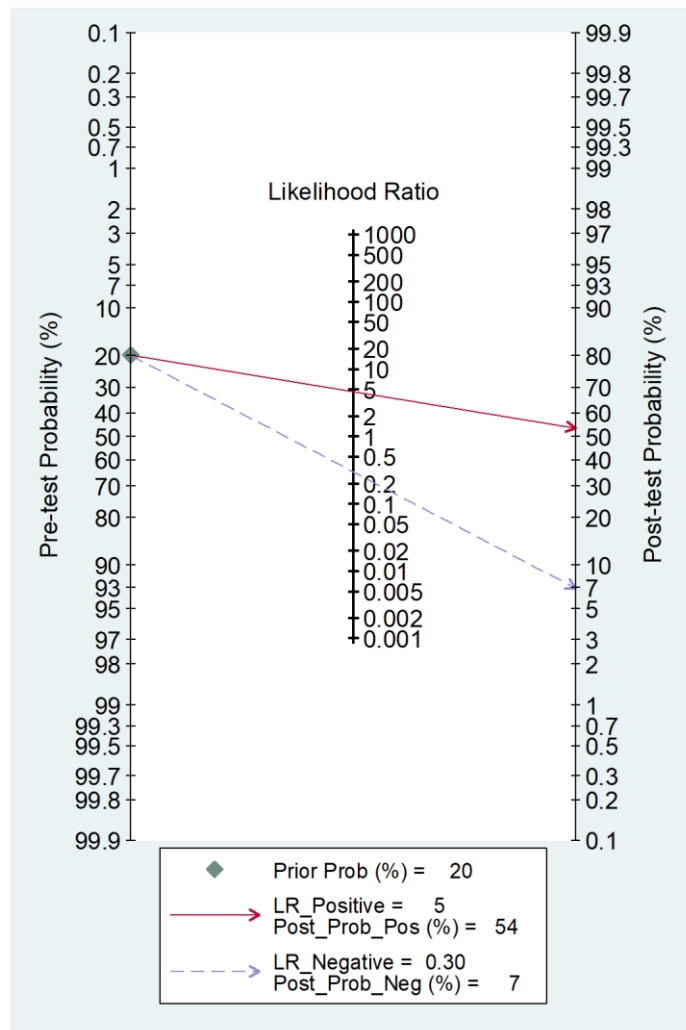

Figure S1. Fagan nomogram of the six prediction models with renal function progression as predicted outcomes.
